# Supplementary material
Source: publisher figshare collection journal article supplement (https://karger.figshare.com/ndownloader/files/25194884)
Supplement: Supplementary file 1 [file 25194884]

Online Supplemental Tab. 1.1. Eingeschlossene Depressions-Apps und deren Ergebnisse.

| **Name der App** | **Erstautor, Jahr** | **Beschreibung der App** | **Studiendesign**  **&**  **Erhebungszeitpunkte** | **Stichprobe**  **&**  **Intervention** | **Compliance (Abschluss der Behandlung)** | **Qualitätsbewertung (Schwächen)1** |
| --- | --- | --- | --- | --- | --- | --- |
| **Interventionsbasierte Apps – mit Therapeutenkontakt** | | | | | | |
| **VIARY**  (Smartphonbasiertes “behavioral activation training”/ BA) | Ly, 2012 | Rational: KVT  Schrittweises behaviorales Programm “behavioral activation training” (BA). Datenbank an Aktivitäten. Ziel: Steigerung der Aktivität | **Fallbericht, Akzeptanz, Durchführbarkeit**  Erhebungszeitpunkte: 2 (Baseline, nach 4 Wochen) | N = 11 gesunde User (undifferenzierte Diagnosen) | 0% | (1), (2), (3), (5), (7), (8), (9), (10) |
| Ly, 2014 | **RCT**  Erhebungszeitpunkte: 3 (Baseline, nach 8 Wochen/ Ende der Intervention, nach 8 Monaten/ Follow-up) | N=81 Major Depression  (PHQ-9≥5; DSM-IV Interview)  IG I (Smartphonebasiertes “behavioral activation training”/ BA) = 40  IG II (Smartphonebasiertes “mindfulness training”/MT) = 41  Alter (M, SD): 36,1 (10,8) Jahre | BA: 10%  MT: 12,18% | (3) |
| Ly, 2015a | **Durchführbarkeit, Akzeptanz**  Erhebungszeitpunkte: 1 (nach der Intervention) | N=12 Major Depression  (PHQ-9≥5; DSM-IV Interview)  Qualitative Interviews  Alter (Range):  20-59 Jahre | 0% | (1), (2), (3), (8), (9) |
| Ly, 2015b | **RCT**  Erhebungszeitpunkte: 3 (Baseline, nach 9 Wochen/ Ende der Intervention, nach 6 Monaten/ Follow-up) | N=93 Major Depression  (PHQ-9≥5; DSM-IV Interview)  IG (BA mit App): N=47  KG (BA ohne App): N=46  Alter (M, SD): 30,6 (11,4) Jahre | BA mit App:  4,35% | (3) |
| **Mobiletype**  (Mobile Tracking Young People’s Experiences) | Reid, 2011 | Rational: KVT  Self-Monitoring App bei Ängsten und depressiven Symptomen, Erfassung des Verhaltens | **RCT**  Erhebungszeitpunkte: 4 (Baseline, bei Besprechung der Ergebnisse mit dem Hausarzt/ Post-Test, nach 6 Wochen/ Ende der Intervention, nach 6 Monaten/ Follow-up) | N=118 undifferenzierte Diagnosen (depressive bzw. Angstsymptome) (K10>16)  IG (App-Nutzung): N=69  KG (verkürzte Version der App ohne die Module zur psychischen Gesundheit; attention control intervention): N=49  Alter (M, SD): IG = 18,5 (3,2) Jahre; KG = 17,4 (3,2) Jahre | 25% | (3), (4), (5), (10) |
| Kauer, 2012 |
| Reid, 2013 |
| **Kokoro** | Mantani, 2017 | Rational: KVT  Bestehend aus 8 Modulen im Cartoon-Charakter:  Willkommenssitzung, zwei Sitzungen zu Self-Monitoring, zwei Sitzungen zu Verhaltensaktivierung mit Verhaltensexperimenten, zwei Sitzungen zu kognitiver Umstrukturierung, eine Sitzung zu Rückfallprophylaxe | **RCT**  Erhebungszeitpunkte: 5 (Baseline, Woche 1, Woche 5, Woche 9/ Ende der Intervention, Woche 17/ Follow-up) | N=164 depressive Störung (DSM-5)  IG (App plus Pharmakotherapie): N=81 (Furukawa et al., 2018 analysieren nur diese Teilstichprobe)  KG (Pharmakotherapie): N=83  Alter (M, SD):  40,2 (8,8) Jahre (IG)  41,6 (8,9) Jahre (KG) | 1,67% | (3) |
| Furukawa, 2018 | (2), (3) |
| **Unbekannt**  (Smartphonebasiertes “mindfulness training”/ MT) | Ly, 2014 | Rational: Achtsamkeitsbasierte Verfahren  Schrittweises achtsamkeitsbasiertes Programm mit Audioanleitungen | Siehe Ly, 2014 | Siehe Ly, 2014 | Siehe Ly, 2014 | (3) |
| **Get Happy Program** | Watts, 2013 | Rational: KVT  6 Unterrichtseinheiten über Zeitraum von 8 Wochen. Aufbau wie Komikbuch mit depressiver Hauptfigur „Jess“ | **Pilot RCT**  Erhebungszeitpunkte: 4 (Baseline, nach 4 Wochen, nach 8 Wochen/ Ende des Programms, nach 3 Monaten/ Follow-up) | N = 35 Major Depression  (10≤PHQ-9>24; MINI/ DSM-IV)  IG (App): N=15  KG (identische Intervention mittels Computer; „Sadness  Program“): N=20  Alter (Range): 18-63 Jahre | IG: 33,33%  KG: 25% | (3), (4), (5), (9) |
| **eATROS**† | Schmädeke, 2015 | Rational: KVT  Smartphonegestützte Selbstregulation | **Prospektive Kontrollgruppenstudie**  Erhebungszeitpunkte: 2 (Baseline, Ende der Intervention/ nach 3 Monaten) | N=92 unipolare affektive Störung (ICD-10)  IG (App plus poststationäre Regelversorgung: N=50  KG (poststationäre Regelversorgung): N=42  Alter (Range): 18-60 Jahre | 0% | (1), (2), (3), (5) |
| **Intellicare Suite**‡ | Mohr, 2017 | Rational: KVT, Skills-Training  14 unterschiedliche Apps (13 Apps zur Intervention bei Ängsten und Depressionen: „Worry Knot“, „Boost Me“, „Day to Day“, „Social Force”, “My Mantra”, “Aspire”, “Daily Feats”, “Thought Challenger”, “iCope”, “Purple Chill”, “Move Me” und “Slumber Time”; 1 App „Hub“ zur Koordination der anderen Apps) | **Prä-Post-Studie, Nutzungsverhalten**  Erhebungszeitpunkte: 3 (Baseline, nach 4 Wochen, nach 8 Wochen) | N=105 undifferenzierte Diagnosen (depressive bzw. Angstsymptome) (GAD-7≥8 oder PHQ-9 ≥10)  Alter (Range): 27-50 Jahre | 6% | (1), (2), (3), (8), (10) |
| Lattie, 2016 | **Useranalyse** | N = 5210 User der App (undifferenzierte Diagnosen) | - | (1), (2), (3), (4), (5), (6), (7), (8), (10) |
| Cheung, 2018 | **Useranalyse** | N= 4561 User der App (undifferenzierte Diagnosen)  User der „Hub“-App: N= 1514  Keine Nutzung der „Hub“-App = N =3047 | - |
| **Push-D**  (**P**ractice and **U**se **S**elf-**h**elp for **D**epression) | Mehrotra., 2017 | Rational: KVT, interpersonelle Therapie, positive Psychologie  Gliederung der App in 10 Abschnitte/ Sektionen, die nacheinander durchlaufen werden müssen | **Prä-Post-Studie, Durchführbarkeit, Akzeptanz**  Erhebungszeitpunkte: 4 (Baseline, nach Abschnitt 5/ nach 1 Monat, nach Abschnitt 10/ Ende der Intervention/ nach 2 Monaten, nach weiteren 2 Monaten/ Follow-up) | N=78 depressive Störung (BDI≥13; MINI/ SCID)  Nutzung der App bis Vollendung des 10. Abschnitts  Alter (M, SD): 32,28 (12,98) Jahre | 74,36% | (1), (3), (8) |
| **Prime-D**  **(P**ersonalized **r**eal-time **i**ntervention for  **m**otivational **e**nhancement for **d**epression) | Schlosser, 2017 | Rational: KVT, Achtsamkeitsbasierte Verfahren  App basierend auf sozialem Internetnetzwerk. Erstellung eines individuellen Profils durch Nutzer | **Prä-Post-Studie, Durchführbarkeit, Akzeptanz**  Erhebungszeitpunkte: 6 (nach 1 Woche, nach 2 Wochen, nach 3 Wochen, nach 4 Wochen, nach 8 Wochen/ Ende der Intervention, nach 12 Wochen/ Follow-up) | N=36 undifferenzierte Diagnosen (depressive Symptomatik) (PHQ-9≥5 oder Item 10 des PHQ-9≥2)  Tägliche Nutzung der App über einen Zeitraum von 8 Wochen (mind. 1x/ Woche)  Alter (M, SD): 31,33 (12,4) Jahre | 0% | (1), (3), (8), (9), (10) |
| **Behavioral Apptivation**‡ | Dahne, 2017 | Rational: KVT  App basierend auf Verhaltensaktivierung  Features (v.a. Monitoring von Gefühlen und Aktivitäten) | **Prä-Post-Studie, Durchführbarkeit, Akzeptanz**  Erhebungszeitpunkte: 9 (Baseline, nach der 1. Sitzung, nach der 2. Sitzung, nach der 3. Sitzung, nach der 4. Sitzung, nach der 5. Sitzung, nach der 6. Sitzung, nach der 7. Sitzung, nach der 8. Sitzung/ Ende der Intervention) | N=11 depressive Symptomatik (BDI≥14)  Nutzung der App parallel zur face-to-face-Therapie (Dauer: 8 Sitzungen)  Alter (M, SD):  24,91 (11,73) Jahre | 9,09% | (1), (2), (3), (4), (5), (8), (9), (10) |
| **ACT Daily** | Levin, 2017 | Rational: ACT  Anwendung von ACT-Skills und speziellen Skills zur Verbesserung der psychologischen Flexibilität | **Prä-Post-Studie, Durchführbarkeit**  Erhebungszeitpunkte: 2 (Baseline, nach 2 Wochen/ Ende der Intervention) | N=14 undifferenzierte Diagnosen (Depression und Angst)  Alter (M, SD): 29 (11,55) Jahre | 7,14% | (1), (2), (3), (5), (7), (8), (9), (10) |
| **Mobilyze** | Burns, 2011 | Rational: Verhaltensaktivierung, KVT  Mittels kontextbezogener Systeme (z.B. GPS) basierend auf 3 Phasen: (1) Datenerhebungs-Phase (2) Lern-Phase (3) Generierung von individuellen Vorhersagen in Bezug auf den User | **Pilot Prä-Post-Studie, Durchführbarkeit,**  **Akzeptanz**  Erhebungszeitpunkte: 3 (Baseline, nach 4 Wochen, nach 8 Wochen/ Ende der Intervention) | N=8 Major Depression  (MINI/ DSM-V, QIDS-C≥11, PHQ-8≥10)  Alter (Range): 19-59 Jahre | 12,5% | (1), (2), (3), (8), (9) |
| **TODAY!** | Fleming, 2017 | Rational: KVT  Spezielle 10-wöchige Intervention für Männer, die einer sexuellen Minderheit angehören mit zusätzlichen wöchentlichen, therapeutischen Kontakten via Email, Telefon oder SMS | **Durchführbarkeit**  Erhebungszeitpunkte**:** 1 (nach Interaktion mit der App) | N=9 depressive oder Angstsymptome (PHQ-4 ≥3)  Alter (M, SD): 19 (0,71) Jahre | 0% | (1), (2), (3), (4), (5), (6), (7), (8), (9), (10) |
| **Interventionsbasierte Apps – ohne Therapeutenkontakt** | | | | | | |
| **myCompass** | Proudfoot, 2013 | Rational: KVT, interpersoneller Therapie, Problem-Solving Therapy, positive Psychologie  Ziel: Behandlung von leichter bis mittelgradiger Depression, Ängsten und Stress. Bestehend aus App und Internet-Modul  Internet-Modul:  12 Skills fokussierte Module | **RCT**  Erhebungszeitpunkte: 3 (Baseline, nach 7 Wochen/ Ende der Intervention, nach 3 Monaten/ Follow-up) | N = 720 undifferenzierte Diagnosen (leichte bis mittelgradige Depression, Ängste oder Stress)  (DASS= 27-63)  IG (App-Nutzung): N=242  KG (Psychoedukation mittels Computer/ SMS; attention control intervention): N= 248  WL: N=230  Alter (M): 38,9 Jahre | 45,5% | (3), (4), (5), NA: (7), (10) |
| Clarke, 2014 | **RCT**  Erhebungszeitpunkte: 2 (Baseline, nach 8 Wochen) |
| Whitton, 2015 | **RCT**  Erhebungszeitpunkte: siehe Proudfoot, 2013 | N=242 (IG aus Proudfoot, 2013) |
| Clarke, 2016 | **RCT**  Erhebungszeitpunkte: siehe Proudfoot, 2013 | N=242 (IG aus Proudfoot, 2013) |
| **iPST**  (internet-based problem-solving training) | Arean, 2016 | Rational: Problemlösungstherapie  7-Stufen-Modell zur Stimmungsregulation | **RCT**  Erhebungszeitpunkte: 7 (Baseline, Woche 1, Woche 2, Woche 3, Woche 4, Woche 8, Woche 12) | N = 626 undifferenzierte Diagnosen (depressive Symptomatik)  (PHQ-9≥5)  IG I (App “iPST”): N=211  IG II (App “EVO”: Modulation von kognitiver Kontrollfähigkeit/ experimentelles Design): N=209  KG (Gesundheitsratschläge): N=206  Alter (M, SD): 33,9 (11,84) Jahre | 57,9% | (3), NA: (7), (10) |
| Anguera, 2016 | **Durchführbarkeit**  Erhebungszeitpunkte: 4 (Baseline, Woche 4, Woche 8, Woche 12) |
| **MoodHacker**‡ | Birney, 2016 | Rational: KVT, achtsamkeitsbasierte Strategien, positive Psychologie  Ziel: Verbesserung des Selbstmanagements in Bezug auf Stimmung | **RCT,**  **Durchführbarkeit, Akzeptanz, Nutzungsverhalten**  Erhebungszeitpunkte: 3 (Baseline, nach 6 Wochen/ Ende der App-Nutzung, nach 10 Wochen /Follow-up) | N=300 undifferenzierte Diagnosen (leichte bis mittelgradige depressive Symptomatik)  (PHQ-9=10-19)  IG (App): N=150  KG (alternative Versorgung mit Links zu Depressions-Websites): N=150  Alter (M, SD): IG=40,6 (11,5) Jahre; KG=40,7 (11,2) Jahre | 6,67 % | (3), (4), (5), NA: (7), (10) |
| **Woebot**‡ | Fitzpatrick, 2017 | Rational: KVT  Automatisierter Gesprächspartner via Instant Messenger App. Kurze, tägliche Unterhaltungen und Self-Monitoring von Stimmung. App frägt User nach aktuellen Kontextinformationen/ Stimmung und antwortet User auf empathische Art | **RCT,**  **Durchführbarkeit, Akzeptanz**  Erhebungszeitpunkte: 2 (Baseline, nach 2 Wochen/ Ende der Intervention) | N=70 (undifferenzierte Diagnosen)  IG (App): N=34  KG (Informationen über Depressionen/ e-Book): N=36  Alter (M, SD): 22,2 (2,33) Jahre | 17% | (2), (3), (4), (5), NA: (7), (10) |
| **Todac Todac** | Hur, 2018 | Rational: KVT  Auf Szenario basierendes 3-stufiges Quiz  1. Stufe: Identifikation kognitiver Fehler  2. Stufe: Entkatastrophisierende Fragen (kognitive Umstrukturierung)  3. Stufe: Fragen zum Aufbau einer Distanz zu kognitiven Fehlern | **RCT**  Erhebungszeitpunkte:2 (Baseline, nach 3 Wochen) | N=48 Depression (undifferenziert) (SCID)  IG (App): N=24  KG (Stimmungsdiagramm): N=24  Alter (M, SD): 23,71 (3,26) Jahre | 29,17% | (2), (3), (4), NA: (7), (9) |
| **MOSS**  (**Mo**bile **S**ensing and **S**upport) | Wahle, 2016 | Rational: KVT  Aufzeichnung von Kontextinformationen des Users durch das Smartphone (generelle Mittels Maschinenlernen kann App in das Verhalten des Users mithilfe von Handlungsvorschlägen intervenieren | **Naturalistische Prä-Post-Studie, Durchführbarkeit, Akzeptanz**  Erhebungszeitpunkte:2 (Baseline, nach 4 Wochen) | N=126 undifferenzierte Diagnosen (depressive Symptomatik)  (PHQ-9≥11)  Nutzung der App in vier aufeinanderfolgenden Wochen.  Alter (Range): 20-57 Jahre | 77,78% | (1), (2), (3), (4), (5), NA: (7), (8), (10) |
| **SPSRS** | Takahashi, 2019 | Rational: Motivationsaufbau für Verhaltensaktivierung  Videos zeigen die Wörter „can”, „let us try,”, „good luck”, „able” und „do not worry”, die zufällig in den 4 Ecken des Displays für 17ms eingeblendet werden. Danach erscheinen positive Wörter wie „nice“, „great“, „fantastic“, „satisfactory“ oder „enjoyable“ für 5s | **Prä-Post-Studie, Durchführbarkeit**  Erhebungszeitpunkte:2 (Baseline, nach 5 Wochen) | N=22 unterschwellige Depression (CES-D≥16)  Nutzung der App für 5 Wochen 70 Minuten/ Woche  Alter (M, SD): 20,0 (0,62) Jahre | 50% | (1), (2), (3), NA: (7), (8), (9), (10) |
| **Catch it**‡ | Kinderman, 2016 | Rational: KVT  Nutzung von Selfmonitoring mit 3 Bausteinen: „Catch it“ (Identifizierung von depressionergen Gedanken und Denkmustern), „Check it“ (Prüfung der Denkmuster als hilfreich oder weniger hilfreich) „Change it“ (evtl. Veränderung des Denkmusters) | **Durchführbarkeit, Akzeptanz** | N=285  User der App (undifferenzierte Diagnosen)  Alter (Range): 18-85 Jahre | - | (1), (2), (3), (4), (5), (6), NA: (7), (8), (10) |
| **Thought Challenger**‡  (Teil der Intellicare Suite) | Stiles-Shields, 2017 | Rational: KVT  Identifikation und kognitive Umstrukturierung dysfunktionaler Gedanken in 5 Schritten: (1) „Catch It”: Benennung dysfunktionaler Gedanken ; (2) „Check It”: Reflektion des Gedankens; (3) „Choose a Distortion”: Identifikation des Denkfehlers; (4) Prüfung des Denkfehlers; (5) „Change It”: Entwicklung eines funktionalen Gedankens | **Durchführbarkeit**  Erhebungszeitpunkte:2 (Screening, nach Interaktion mit der App/ nach ca. einer Woche) | N=20 undifferenzierte Diagnosen (keine bis schwere depressive Symptomatik)  (PHQ-9≥10)  Einmalige Nutzung der App unter einer Laborbedingung  Alter (M, SD): 37,2 (12,2) Jahre | 0% | (1), (2), (3), (4), (5), NA: (7), (8), (9), (10) |
| **Daybuilder** | Løventoft, 2012 | Rational: KVT  App basierend auf Self-Monitoring von Verhalten | **Durchführbarkeit**  Erhebungszeitpunkte: 1 (nach Nutzung der App) | N=6 User der App (undifferenzierte Diagnosen)  Nutzung der App für ca. 4 Wochen  Alter (Range): 17-24 Jahre | 16,67% | (1), (2), (3), (4), NA: (7), (8), (9), (10) |
| **FINE** | Dang, 2016 | Rational: keine Angaben  Aufzeichnung von Kontextinformationen des Users durch das Smartphone und Selfmonitoring der Stimmung sowie Verlaufsmessung durch Fragebogen | **Durchführbarkeit**  Erhebungszeitpunkte**:** 1 (nach 1-wöchiger Nutzung der App) | N=4 Major Depression (keine Angaben über Diagnosestellung)  Alter (Range): 27-46 Jahre | 25% | (1), (2), (4), (5), (6), NA: (7), (8), (9), (10) |

†auf Deutsch verfügbar;‡in deutschen App-Stores verfügbar

1(1) Vorliegen einer unkontrollierten Studie, (2) Keine Follow-up-Daten, (3) Ausschließliches Vorliegen von Selbstbeurteilungsinstrumenten als Ergebnismessung, (4) Keine Angaben bzgl. ergänzender, weiterer psychotherapeutischen Interventionen, (5) Keine Angaben bzgl. Psychopharmakotherapie, (6) Keine Analyse der Adhärenz der Patienten oder keine Qualitätskontrollen der Behandlung bzw. keine Angaben hierzu, (7) Keine Angaben über die Ausbildung der Therapeuten, (8) Ausschließliches Vorliegen einer Warteliste oder keine Vergleichsstichprobe, (9) Kleine Stichprobengröße (N < 50), (10) Keine Erhebung von DSM- und/ oder ICD-Kriterien.

Online Supplemental Tab. 1.2. Eingeschlossene Depressions-Apps und deren Effektstärken.

| **App** | **RCT** | **Erstautor, Jahr** | **Fragebogen** | **Effektstärke:**  **zwischen Gruppen post**  (Cohen’s d + 95% KI) | **Effektstärke:**  **zwischen Gruppen Katamnese**  (Cohen’s d + 95% KI) |
| --- | --- | --- | --- | --- | --- |
| **Interventionsbasierte Apps – mit Therapeutenkontakt** | | | | | |
| VIARY | x | Ly, 2014 | BDI-II | IG I + IG II = -0,25; KI [-0,71; 0,22] | IG I + IG II = -0,03; KI [-0,51; 0,44] |
| x | Ly, 2015b | BDI-II | IG I + KG = 0,13; KI [-0,28; 0,55] | IG I + IG II = 0,10; KI [-0,35; 0,55] |
| Mobiletype | x | Reid, 2011 | DASS-21  Depression-Subskala | IG + KG = 1,49; KI [1,00; 1,99] | IG + KG = 0,09; KI [-0,34; 0,52] |
| Get Happy Program | x | Watts, 2013 | PHQ-9 | IG + KG = -0,48; KI [-1,30; 0,33] | IG + KG = -1,31; KI [-2,23; -0,39] |
| eATROS | - | Schmädeke, 2015 | BDI-II | IG + KG = -0,08; KI [-0,49; 0,33] | - |
| **Interventionsbasierte Apps – ohne Therapeutenkontakt** | | | | | |
| myCompass | x | Proudfoot, 2013 | DASS-21  Depression-Subskala | IG + KG = -0,33; KI [-0,56; -0,11] | IG + KG = -0,09; KI [-0,34; 0,15] |
| KG + WL = -0,10; KI [-0,29; 0,10] |
| IG + WL = -0,45; KI [-0,67; -0,22] |
| Woebot | x | Fitzpatrick, 2017 | PHQ-9 | IG + KG = -0,63; KI [-1,17; -0,09] | - |
| Todac Todac | x | Hur, 2018 | BDI-II | IG + KG = -0,68; KI [-1,37; 0,01] | - |
| Catch it | - | Kinderman, 2016 | CES-D | Negative + positive mood = -0,61; KI [-0,85; -0,36] | - |

KVT = Kognitive Verhaltenstherapie; RCT = Randomisiert-kontrollierte Studie; PHQ = Patient Health Questionnaire [Kroenke et al., 2001]; IG = Interventionsgruppe; KG = Kontrollgruppe; M = Mittelwert; SD = Standardabweichung; BDI II = Beck-Depressions-Inventar-II [Hautzinger et al., 2006]; K10 = Kessler Psychological Distress Scale [Andrews und Slade, 2001]; DASS = Depression Anxiety Stress Scales [Lovibond und Lovibond, 1995]; MINI = Mini International Neuropsychiatric Interview [Sheehan et al., 1998]; GAD = Generalized Anxiety Disorder Scale [Spitzer et al., 2006]; SCID = Structured Clinical Interview [First et al., 1996]; ACT= Akzeptanz- und Commitmenttherapie; QIDS-C = Quick Inventory of Depression Symptoms–Clinician Rated [Rush et al., 2003]; WL = Warteliste; NA = not available; CES-D = Center for Epidemiological Studies Depression questionnaire [Radloff, 1977]; KI = Konfidenzintervall.

**Literatur**

1. Andrews G, Slade T. Interpreting scores on the Kessler psychological distress scale (K10). Aust N Z J Public Health. 2001;25(6):494-97.

2. Anguera JA, Jordan JT, Castaneda D, Gazzaley A, Arean PA. Conducting a fully mobile and randomised clinical trial for depression: access, engagement and expense. BMJ Innov. 2016 Jan;2(1):14-21.

3. Arean PA, Hallgren KA, Jordan JT, Gazzaley A, Atkins DC, Heagerty PJ, et al. The Use and Effectiveness of Mobile Apps for Depression: Results From a Fully Remote Clinical Trial. J Med Internet Res. 2016 Dec 20;18(12):e330.

4. Birney AJ, Gunn R, Russell JK, Ary DV. MoodHacker mobile web app with email for adults to self-manage mild-to-moderate depression: randomized controlled trial. JMIR mHealth and uHealth. 2016;4(1):e8.

5. Burns MN, Begale M, Duffecy J, Gergle D, Karr CJ, Giangrande E, et al. Harnessing context sensing to develop a mobile intervention for depression. J Med Internet Res. 2011 Aug 12;13(3):e55.

6. Cheung K, Ling W, Karr CJ, Weingardt K, Schueller SM, Mohr DC. Evaluation of a recommender app for apps for the treatment of depression and anxiety: an analysis of longitudinal user engagement. J Am Med Inform Assoc. 2018 Aug 1;25(8):955-62.

7. Clarke J, Proudfoot J, Birch MR, Whitton AE, Parker G, Manicavasagar V, et al. Effects of mental health self-efficacy on outcomes of a mobile phone and web intervention for mild-to-moderate depression, anxiety and stress: secondary analysis of a randomised controlled trial. BMC Psychiatry. 2014 Sep 26;14:272.

8. Clarke J, Proudfoot J, Whitton A, Birch MR, Boyd M, Parker G, et al. Therapeutic Alliance With a Fully Automated Mobile Phone and Web-Based Intervention: Secondary Analysis of a Randomized Controlled Trial. JMIR Ment Health. 2016 Feb 25;3(1):e10.

9. Dahne J, Lejuez CW, Kustanowitz J, Felton JW, Diaz VA, Player MS, et al. Moodivate: A self-help behavioral activation mobile app for utilization in primary care-Development and clinical considerations. Int J Psychiatry Med. 2017 Mar;52(2):160-75.

10. Dang M, Mielke C, Diehl A, Haux R. Accompanying Depression with FINE-A Smartphone-Based Approach. MIE2016. p. 195-99.

11. First MB, Spitzer RL, Gibbon M, Williams JBW. Structured Clinical Interview for DSM-IV Axis I Disorders, Clinician Version (SCID-CV). Washington, D.C.: American Psychiatric Press, Inc.; 1996.

12. Fitzpatrick KK, Darcy A, Vierhile M. Delivering Cognitive Behavior Therapy to Young Adults With Symptoms of Depression and Anxiety Using a Fully Automated Conversational Agent (Woebot): A Randomized Controlled Trial. JMIR Ment Health. 2017 Jun 6;4(2):e19.

13. Fleming JB, Hill YN, Burns MN. Usability of a Culturally Informed mHealth Intervention for Symptoms of Anxiety and Depression: Feedback From Young Sexual Minority Men. JMIR Hum Factors. 2017 Aug 25;4(3):e22.

14. Furukawa TA, Horikoshi M, Fujita H, Tsujino N, Jinnin R, Kako Y, et al. Cognitive and Behavioral Skills Exercises Completed by Patients with Major Depression During Smartphone Cognitive Behavioral Therapy: Secondary Analysis of a Randomized Controlled Trial. JMIR Ment Health. 2018 Jan 11;5(1):e4.

15. Hautzinger M, Keller F, Kühner C. BDI-II. Beck Depressions-Inventar. Revision. Manual. Frankfurt: Harcourt Test Services; 2006.

16. Hur JW, Kim B, Park D, Choi SW. A Scenario-Based Cognitive Behavioral Therapy Mobile App to Reduce Dysfunctional Beliefs in Individuals with Depression: A Randomized Controlled Trial. Telemed J E Health. 2018 Sep;24(9):710-16.

17. Kauer SD, Reid SC, Crooke AH, Khor A, Hearps SJ, Jorm AF, et al. Self-monitoring using mobile phones in the early stages of adolescent depression: randomized controlled trial. J Med Internet Res. 2012 Jun 25;14(3):e67.

18. Kinderman P, Hagan P, King S, Bowman J, Chahal J, Gan L, et al. The feasibility and effectiveness of Catch It, an innovative CBT smartphone app. BJPsych Open. 2016 May;2(3):204-09.

19. Kroenke K, Spitzer R, Williams J. The PHQ-9. Validity of a brief depression severity measure. J Gen Intern Med. 2001;16:606 - 13.

20. Lattie EG, Schueller SM, Sargent E, Stiles-Shields C, Tomasino KN, Corden ME, et al. Uptake and Usage of IntelliCare: A Publicly Available Suite of Mental Health and Well-Being Apps. Internet Interv. 2016 May;4(2):152-58.

21. Levin ME, Haeger J, Pierce B, Cruz RA. Evaluating an Adjunctive Mobile App to Enhance Psychological Flexibility in Acceptance and Commitment Therapy. Behav Modif. 2017 Nov;41(6):846-67.

22. Løventoft PK, Nørregaard LB, Frøkjær E. Designing daybuilder: an experimental app to support people with depression. Proceedings of the 12th Participatory Design Conference: Exploratory Papers, Workshop Descriptions, Industry Cases-Volume 2: ACM; 2012. p. 1-4.

23. Lovibond PF, Lovibond SH. The structure of negative emotional states: comparison of the Depression Anxiety Stress Scales (DASS) with the Beck Depression and Anxiety Inventories. Behav Res Ther. 1995 Mar;33(3):335-43.

24. Ly KH, Dahl J, Carlbring P, Andersson G. Development and initial evaluation of a smartphone application based on acceptance and commitment therapy. SpringerPlus. 2012;1:11.

25. Ly KH, Janni E, Wrede R, Sedem M, Donker T, Carlbring P, et al. Experiences of a guided smartphone-based behavioral activation therapy for depression: a qualitative study. Internet Interventions. 2015a;2(1):60-68.

26. Ly KH, Topooco N, Cederlund H, Wallin A, Bergstrom J, Molander O, et al. Smartphone-Supported versus Full Behavioural Activation for Depression: A Randomised Controlled Trial. PLOS ONE. 2015b;10(5):e0126559.

27. Ly KH, Truschel A, Jarl L, Magnusson S, Windahl T, Johansson R, et al. Behavioural activation versus mindfulness-based guided self-help treatment administered through a smartphone application: a randomised controlled trial. BMJ Open. 2014 Jan 9;4(1):e003440.

28. Mantani A, Kato T, Furukawa TA, Horikoshi M, Imai H, Hiroe T, et al. Smartphone Cognitive Behavioral Therapy as an Adjunct to Pharmacotherapy for Refractory Depression: Randomized Controlled Trial. J Med Internet Res. 2017 Nov 3;19(11):e373.

29. Mehrotra S, Sudhir P, Rao G, Thirthalli J, Srikanth TK. Development and Pilot Testing of an Internet-Based Self-Help Intervention for Depression for Indian Users. Behav Sci (Basel). 2018 Mar 22;8(4).

30. Mohr DC, Tomasino KN, Lattie EG, Palac HL, Kwasny MJ, Weingardt K, et al. IntelliCare: An Eclectic, Skills-Based App Suite for the Treatment of Depression and Anxiety. J Med Internet Res. 2017 Jan 5;19(1):e10.

31. Proudfoot J, Clarke J, Birch MR, Whitton AE, Parker G, Manicavasagar V, et al. Impact of a mobile phone and web program on symptom and functional outcomes for people with mild-to-moderate depression, anxiety and stress: a randomised controlled trial. BMC Psychiatry. 2013 Nov 18;13:312.

32. Radloff LS. The CES-D scale: A self report depression scale for research in the general population. Applied Psychological Measurement. 1977;1:385-401.

33. Reid SC, Kauer SD, Hearps SJ, Crooke AH, Khor AS, Sanci LA, et al. A mobile phone application for the assessment and management of youth mental health problems in primary care: a randomised controlled trial. BMC Fam Pract. 2011 Nov 29;12:131.

34. Reid SC, Kauer SD, Hearps SJ, Crooke AH, Khor AS, Sanci LA, et al. A mobile phone application for the assessment and management of youth mental health problems in primary care: health service outcomes from a randomised controlled trial of mobiletype. BMC Fam Pract. 2013 Jun 19;14:84.

35. Rush AJ, Trivedi MH, Ibrahim HM, Carmody TJ, Arnow B, Klein DN, et al. The 16-Item Quick Inventory of Depressive Symptomatology (QIDS), clinician rating (QIDS-C), and self-report (QIDS-SR): a psychometric evaluation in patients with chronic major depression. Biol Psychiatry. 2003;54(5):573-83.

36. Schlosser DA, Campellone TR, Truong B, Anguera JA, Vergani S, Vinogradov S, et al. The feasibility, acceptability, and outcomes of PRIME-D: A novel mobile intervention treatment for depression. Depress Anxiety. 2017 Jun;34(6):546-54.

37. Schmädeke S, Bischoff C. Wirkungen smartphonegestützter psychosomatischer Rehabilitationsnachsorge (eATROS) bei depressiven Patienten. Verhaltenstherapie. 2015;25(4):277-86.

38. Sheehan DV, Lecrubier Y, Sheehan KH, Amorim P, Janavs J, Weiller E, et al. The Mini-International Neuropsychiatric Interview (M.I.N.I.): the development and validation of a structured diagnostic psychiatric interview for DSM-IV and ICD-10. J Clin Psychiatry. 1998;59 Suppl 20:22-33;quiz 34-57.

39. Spitzer RL, Kroenke K, Williams JB, Lowe B. A brief measure for assessing generalized anxiety disorder: the GAD-7. Arch Intern Med. 2006 May 22;166(10):1092-7.

40. Stiles-Shields C, Montague E, Lattie EG, Schueller SM, Kwasny MJ, Mohr DC. Exploring User Learnability and Learning Performance in an App for Depression: Usability Study. JMIR Hum Factors. 2017 Aug 11;4(3):e18.

41. Takahashi K, Takada K, Hirao K. Feasibility and preliminary efficacy of a smartphone application intervention for subthreshold depression. Early Interv Psychiatry. 2019 Feb;13(1):133-36.

42. Wahle F, Kowatsch T, Fleisch E, Rufer M, Weidt S. Mobile Sensing and Support for People With Depression: A Pilot Trial in the Wild. JMIR Mhealth Uhealth. 2016 Sep 21;4(3):e111.

43. Watts S, Mackenzie A, Thomas C, Griskaitis A, Mewton L, Williams A, et al. CBT for depression: a pilot RCT comparing mobile phone vs. computer. BMC Psychiatry. 2013 Feb 7;13:49.

44. Whitton AE, Proudfoot J, Clarke J, Birch MR, Parker G, Manicavasagar V, et al. Breaking Open the Black Box: Isolating the Most Potent Features of a Web and Mobile Phone-Based Intervention for Depression, Anxiety, and Stress. JMIR Ment Health. 2015 Jan-Mar;2(1):e3.
